# Supplementary material for: Development of a designed comparison method based on isotope dilution liquid chromatography–tandem mass spectrometry for determining plasma renin activity and its clinical assessment of renin activity stability in plasma
Source: Royal Society of Chemistry journal article supplement (doi:10.1039/d2ay01646j), 2023-01-01
Supplement: d2ay01646j1.pdf [file d2ay01646j1.pdf]

**Supplemental Table 1** The analytical recovery experiment of PRA plasma spiked with Ang1 working solution

|          | Non-spiked<br>concentration, ng/mL | sample<br>Theoretical<br>concentration,<br>ng/mL | Measured<br>concentration, ng/mL | Bias, % |
|----------|------------------------------------|--------------------------------------------------|----------------------------------|---------|
| Plasma 1 | 8.89                               |                                                  |                                  |         |
| Spiked 1 |                                    | 9.13                                             | 8.63                             | -5.5    |
| Spiked 2 |                                    | 9.49                                             | 8.20                             | -13.6   |
| Plasma 2 | 17.75                              |                                                  |                                  |         |
| Spiked 1 |                                    | 18.76                                            | 13.64                            | -27.3   |
| Spiked 2 |                                    | 18.41                                            | 13.15                            | -28.6   |

*Note:* Ang1 standard solutions were gravimetrically weighed to the plasma, and then perform the incubation and sample extraction, lastly, quantify the total Ang1 levels
